# Supplementary material for: Anisotropic two-dimensional sheets assembled from rod-shaped metal complexes
Source: Royal Society of Chemistry journal article supplement (doi:10.1039/c1cc14937g), 2011-11-05
Supplement: c1cc14937g.pdf [file c1cc14937g.pdf]

## Electronic Supplementary Information (ESI)

# Anisotropic two-dimensional sheets assembled from rod-shaped metal complexes

Mina Han\* and Tomohiro Hirade

*Department of Chemistry and Department of Electronic Chemistry  
Tokyo Institute of Technology  
4259 Nagatsuta, Midori-ku, Yokohama 226-8502, Japan  
E-mail: han.m.ab@m.titech.ac.jp*

### Contents:

|                                                                                                             |     |
|-------------------------------------------------------------------------------------------------------------|-----|
| 1. <b>Instrumentation</b> .....                                                                             | pS2 |
| 2. <b>Fig. S1</b> UV-vis absorption spectrum of suspensions in $2 \times 10^{-5}$ M THF/H <sub>2</sub> O .. | pS2 |
| 2. <b>Fig. S2</b> AFM images and height profiles .....                                                      | pS3 |
| 3. <b>Fig. S3</b> TEM image of $8 \times 10^{-5}$ M DMF/H <sub>2</sub> O .....                              | pS3 |
| 4. <b>Fig. S4</b> POM image of microsheets .....                                                            | pS4 |
| 5. <b>Fig. S5</b> POM and OM images of microsheets .....                                                    | pS4 |
| 6. <b>Fig. S6</b> XRD patterns .....                                                                        | pS5 |
| 7. <b>Fig. S7</b> NMR data .....                                                                            | pS5 |

## Instrumentation

The TEM (transmission electron microscope) was performed at 100 kV using HITACHI H-7650. The sample was prepared by placing a drop of PdCl<sub>2</sub>Az<sub>2</sub> suspension onto a silicon oxide coated gold grid, and drying in a nitrogen atmosphere at room temperature. Optical microscopy (OM) and polarized optical microscopy (POM) images were obtained using an Olympus BX51 microscope, after putting a drop of suspension on a clean glass substrate. We employed tapping mode atomic force microscopy (AFM: Veeco Instruments Inc., AFM probes: NCH silicon pointprobe® tip, NanoWorld, Switzerland) to characterize the topographic morphology of the samples on a mica substrate. Absorption spectra were obtained using a Shimadzu UV-3150 UV-VIS-NIR scanning spectrophotometer and a JASCO MSV-350 UV-vis microspectrophotometer. X-ray diffraction (XRD) patterns of planar sheets were measured in reflection mode with CuK $\alpha$  radiation on a Bruker D8 diffractometer.

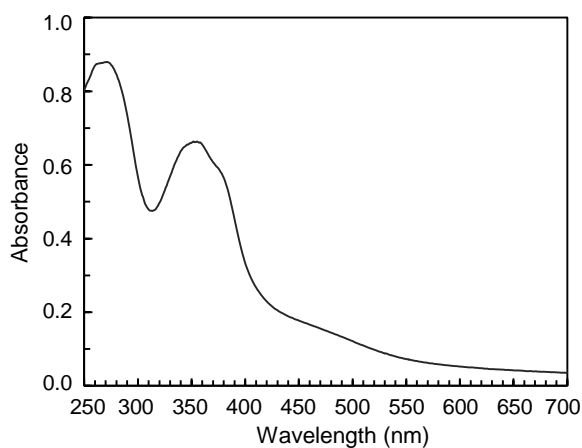

**Fig. S1** UV-vis absorption spectrum of suspensions in  $2 \times 10^{-5}$  M THF/H<sub>2</sub>O (1/4, v/v).

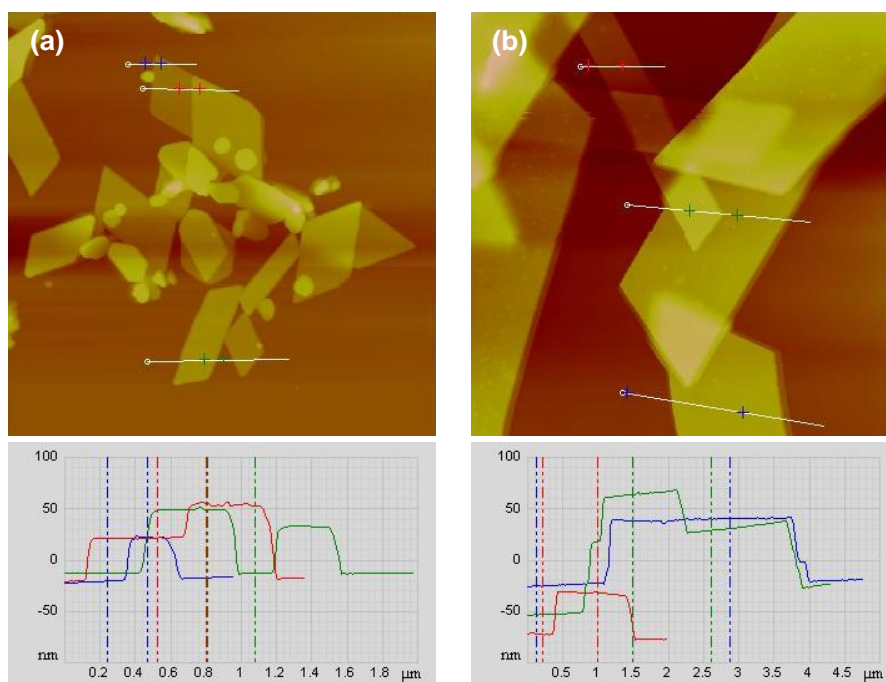

**Fig. S2** AFM images and height profiles of parallelogram-shaped sheets prepared from (a)  $2 \times 10^{-5}$  M THF/H<sub>2</sub>O (1/4, v/v) ( $6 \times 6 \mu\text{m}^2$ ) and (b)  $1 \times 10^{-4}$  M THF/H<sub>2</sub>O (1/1, v/v) ( $10 \times 10 \mu\text{m}^2$ ).

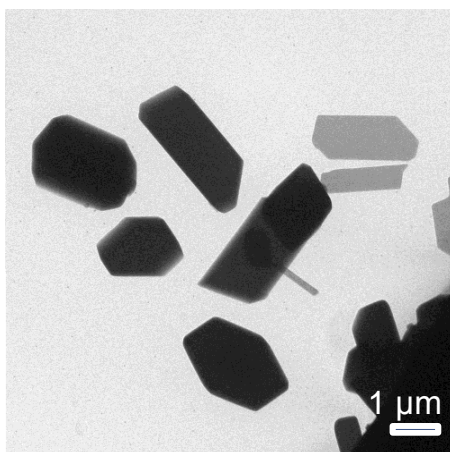

**Fig. S3** TEM image of  $8 \times 10^{-5}$  M DMF/H<sub>2</sub>O (5/1, v/v).

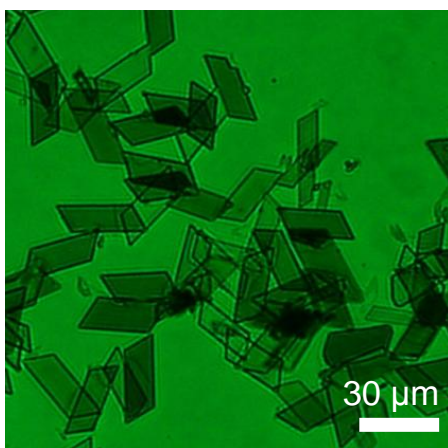

**Fig. S4** POM image of microsheets prepared from  $1.1 \times 10^{-3}$  M THF/H<sub>2</sub>O.

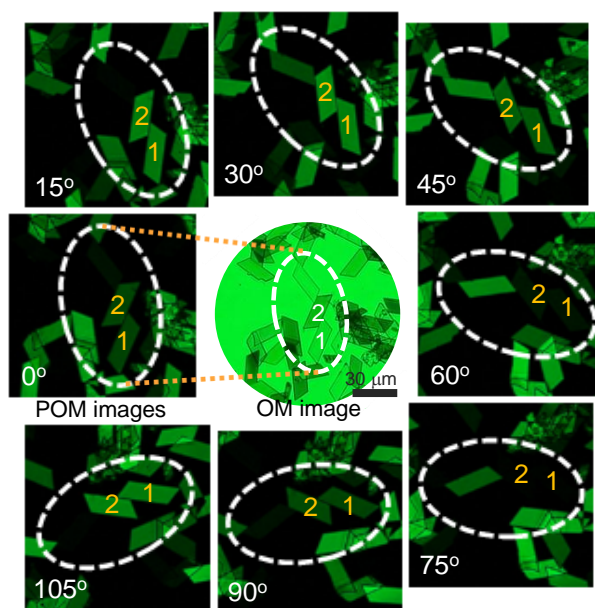

**Fig. S5** POM and OM images of microsheets prepared from  $1.1 \times 10^{-3}$  M THF/H<sub>2</sub>O.

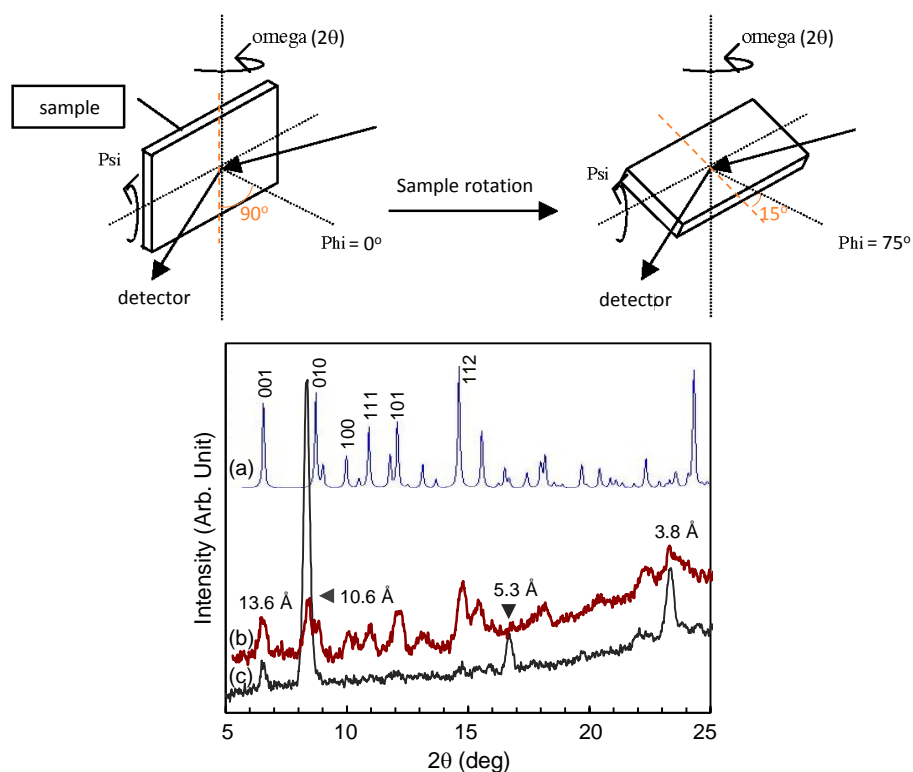

**Fig. S6** XRD patterns of (a) the simulated pattern of the single crystal, (b) taken at  $75^\circ$ , and (c) taken at  $0^\circ$ .

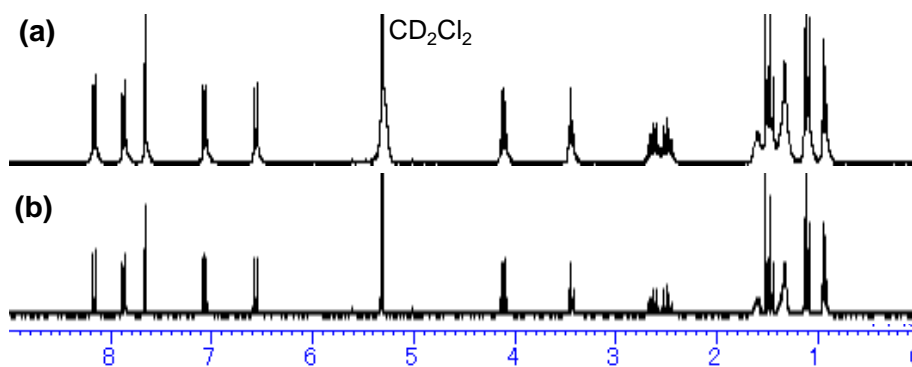

**Fig. S7** NMR spectra of  $\text{PdCl}_2\text{Az}_2$ . (a) purified palladium complex and (b) redissolved in  $\text{CD}_2\text{Cl}_2$  after the formation of complex sheets in  $5.3 \times 10^{-3}$  M THF/ $\text{H}_2\text{O}$  (2/1, v/v).
